# Supplementary material
Source: MDPI journal article supplement (https://www.mdpi.com/2297-8739/9/10/317)

## Supplementary 1

The method was developed using several runs and each run was repeated several times as shown in table 1. Run 6 was repeated several times and the fractions were collected at the retention time 0.7 -1.5 minute and compiled. The volume of the collected fractions was reduced using a rotatory evaporator. The weight obtained was approximately 1 gram, and these fractions were used in run 7. The 1 gm was redissolved in methanol and injected into the Colum (Reverse Silica C18 12g), using a syringe. The solvent system was composed of 1% acetic acid (A) and methanol (B). The run time was ten minutes with a flow rate of 10 ml/min and a gradient mode starting in the first minute with solvent (A) only, then increased to 60% of solvent (B) for half a minute, then increased to 65% and held for three minutes. Another increase to 66% of solution (B) and held for two minutes, finally, increased to 70% for more than two minutes. For detection, three UV wave lengths were used 240, 254, 288 nm and the ELSD. Run 7 was repeated three times, and the fraction collected at the retention time 1.5 -2.5 minute was accumulated. The volume of the accumulated fraction was reduced using the rotary evaporator, producing 0.5 g of the dried extract for run 8.

**Table S1.** method development for the ethanolic extract.

| Run-1              |   |                                                                                      |             |                          |
|--------------------|---|--------------------------------------------------------------------------------------|-------------|--------------------------|
| Sample injected    |   | Ethanolic Extract of Leaves                                                          |             |                          |
| Wavelengths used   |   | UV1: 254 nm                                                                          | UV2: 265 nm | UV3: 280 nm              |
| Solvent Used       |   | Solvent A: N-Hexane                                                                  |             | Solvent B: Ethyl acetate |
| Type of column     |   | Silica 12 g (Normal)                                                                 |             |                          |
| Gradient Table     |   | Minutes                                                                              | Solvents    | %2 <sup>nd</sup> solvent |
|                    | 1 | 0.0                                                                                  | AB          | 0                        |
|                    | 2 | 1.0                                                                                  | AB          | 0                        |
|                    | 3 | 0.0                                                                                  | AB          | 0                        |
|                    | 4 | 5.0                                                                                  | AB          | 50                       |
|                    | 5 | 5.0                                                                                  | AB          | 100                      |
|                    | 6 | 1.0                                                                                  | AB          | 100                      |
|                    | 7 | 0.0                                                                                  | AB          | 100                      |
| Flow Rate          |   | 30 ml / min                                                                          |             |                          |
| Flash Chromatogram |   | 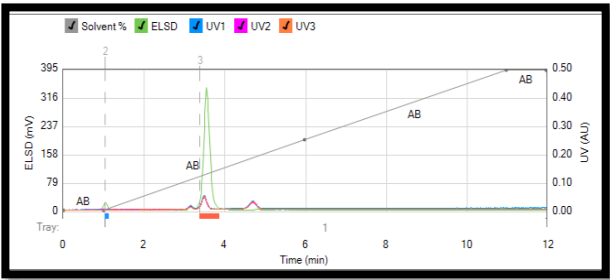 |             |                          |
| Interpretation     |   | no detection                                                                         |             |                          |

| Run-2            |  |                   |                   |                                             |
|------------------|--|-------------------|-------------------|---------------------------------------------|
| Sample injected  |  | Ethanolic Extract |                   |                                             |
| Wavelengths used |  | UV1: 254 nm       | UV2: 265 nm       | UV3: 366 nm                                 |
| Solvent Used     |  | Solvent A : DCM   | Solvent B : Empty | Solvent C: Chloroform<br>Solvent D : Hexane |

| Type of column     |   |         | Silica 4 g                                                                          |                          |
|--------------------|---|---------|-------------------------------------------------------------------------------------|--------------------------|
| Gradient Table     |   | Minutes | Solvents                                                                            | %2 <sup>nd</sup> solvent |
|                    | 1 | 0.0     | AD                                                                                  | 10                       |
|                    | 2 | 1.0     | AD                                                                                  | 20                       |
|                    | 3 | 1.0     | AD                                                                                  | 30                       |
|                    | 4 | 1.0     | CD                                                                                  | 10                       |
|                    | 5 | 1.0     | CD                                                                                  | 20                       |
|                    | 6 | 1.0     | CD                                                                                  | 30                       |
|                    | 7 | 1.0     | CD                                                                                  | 60                       |
| Flow Rate          |   |         | 30 mL/min                                                                           |                          |
| Flash Chromatogram |   |         | 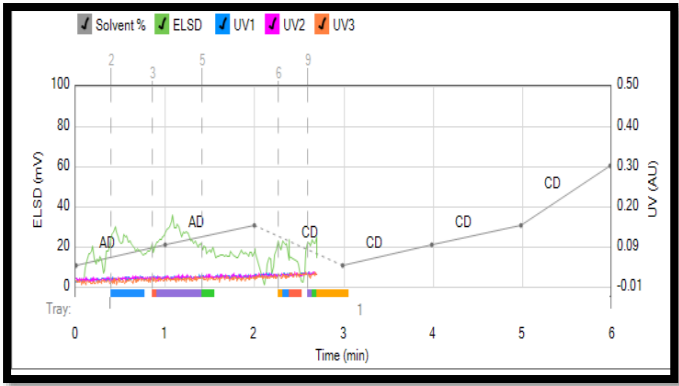 |                          |
| Interpretation     |   |         | No clear separation                                                                 |                          |

| Run-3            |    |                        |             |                                                            |
|------------------|----|------------------------|-------------|------------------------------------------------------------|
| Sample injected  |    | Ethanollic Extract     |             |                                                            |
| Wavelengths used |    | UV1: 254 nm            | UV2: 265 nm | UV3: 280 nm                                                |
| Solvent Used     |    | Solvent A : Toluene    |             | Solvent B : premixed solvent of Acetone and methanol (1:3) |
| Type of column   |    | Reverse Silica C18 12g |             |                                                            |
| Gradient Table   |    | Minutes                | Solvents    | %2 <sup>nd</sup> solvent                                   |
|                  | 1  | 0.0                    | AB          | 0                                                          |
|                  | 2  | 2.0                    | AB          | 10                                                         |
|                  | 3  | 2.0                    | AB          | 20                                                         |
|                  | 4  | 2.0                    | AB          | 30                                                         |
|                  | 5  | 2.0                    | AB          | 40                                                         |
|                  | 6  | 2.0                    | AB          | 50                                                         |
|                  | 7  | 0.6                    | AB          | 50                                                         |
|                  | 8  | 0.1                    | AB          | 50                                                         |
|                  | 9  | 0.5                    | AB          | 52                                                         |
|                  | 10 | 1.2                    | AB          | 69                                                         |
|                  | 11 | 2.6                    | AB          | 50                                                         |
| Flow Rate        |    | 30 ml/min              |             |                                                            |

|                    |                                                                                    |
|--------------------|------------------------------------------------------------------------------------|
| Flash Chromatogram | 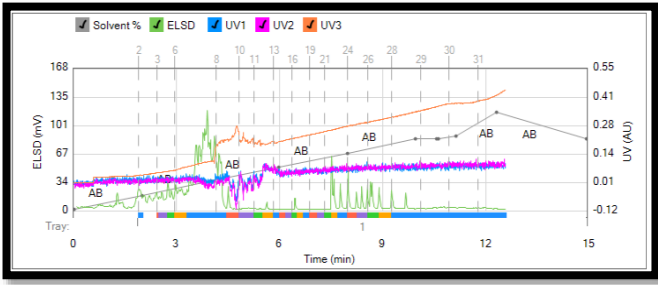 |
| Interpretation     | No clear separation                                                                |

| Run 4              |   |                                                                                      |                      |                                              |
|--------------------|---|--------------------------------------------------------------------------------------|----------------------|----------------------------------------------|
| Sample injected    |   | Ethanolic Extract                                                                    |                      |                                              |
| Wavelengths used   |   | UV1: 254 nm                                                                          | UV2: 265 nm          | UV3: 366 nm                                  |
| Solvent Used       |   | Solvent A : Empty                                                                    | Solvent B : Methanol | Solvent C : Chloroform<br>Solvent D : Hexane |
| Type of column     |   | Silica 4 g                                                                           |                      |                                              |
| Gradient Table     |   | Minutes                                                                              | Solvents             | %2 <sup>nd</sup> solvent                     |
|                    | 1 | 0.0                                                                                  | AB                   | 90                                           |
|                    | 2 | 1.0                                                                                  | AB                   | 80                                           |
|                    | 3 | 1.0                                                                                  | AB                   | 75                                           |
|                    | 4 | 1.0                                                                                  | AB                   | 70                                           |
|                    | 5 | 1.1                                                                                  | AB                   | 70                                           |
|                    | 6 | 1.2                                                                                  | AB                   | 70                                           |
|                    | 7 | 3.7                                                                                  | AB                   | 70                                           |
| Flow Rate          |   | 30 ml/min                                                                            |                      |                                              |
| Flash Chromatogram |   | 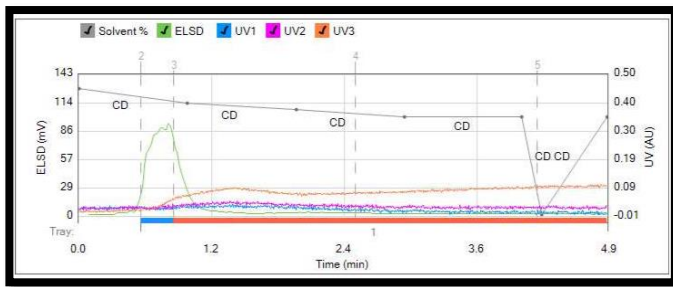 |                      |                                              |
| Interpretation     |   | No clear separation                                                                  |                      |                                              |

| Run 5            |         |                             |                          |                      |
|------------------|---------|-----------------------------|--------------------------|----------------------|
| Sample injected  |         | Ethanolic Extract           |                          |                      |
| Wavelengths used |         | UV1: 254 nm                 | UV2: 265 nm              | UV3: 366 nm          |
| Solvent Used     |         | Solvent A : Dichloromethane |                          | Solvent B : Methanol |
| Type of column   |         | Reverse Silica C18 12g      |                          |                      |
| Gradient Table   | Minutes | Solvents                    | %2 <sup>nd</sup> solvent |                      |

|                    |                                                                                      |             |                      |                          |
|--------------------|--------------------------------------------------------------------------------------|-------------|----------------------|--------------------------|
|                    | 1                                                                                    | 0.0         | AB                   | 10                       |
|                    | 2                                                                                    | 1.0         | AB                   | 20                       |
|                    | 3                                                                                    | 1.0         | AB                   | 30                       |
|                    | 4                                                                                    | 1.0         | AB                   | 40                       |
|                    | 5                                                                                    | 5.0         | AB                   | 40                       |
| Flow Rate          | 30 ml/min                                                                            |             |                      |                          |
| Flash chromatogram | 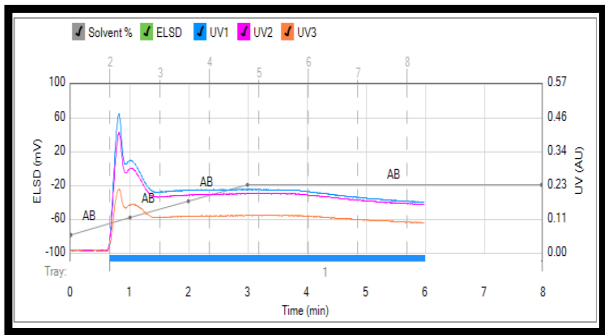   |             |                      |                          |
| Interpretation     | Clear separation.                                                                    |             |                      |                          |
| Run 6              |                                                                                      |             |                      |                          |
| Sample injected    | Ethanolic Extract                                                                    |             |                      |                          |
| Wavelengths used   | UV1: 254 nm                                                                          | UV2: 265 nm | UV3: 366 nm          |                          |
| Solvent Used       | Solvent A :<br>Dichloromethane                                                       |             | Solvent B : Methanol |                          |
| Type of column     | Reverse Silica C18 12g                                                               |             |                      |                          |
| Gradient Table     |                                                                                      | Minutes     | Solvents             | %2 <sup>nd</sup> solvent |
|                    | 1                                                                                    | 0.0         | AB                   | 90                       |
|                    | 2                                                                                    | 1.0         | AB                   | 80                       |
|                    | 3                                                                                    | 1.0         | AB                   | 70                       |
|                    | 4                                                                                    | 1.0         | AB                   | 60                       |
| Flow Rate          | 30 ml/min                                                                            |             |                      |                          |
| Flash chromatogram |  |             |                      |                          |
| Interpretation     | Good separation with a single peak detection                                         |             |                      |                          |

|                  |                                 |             |                     |
|------------------|---------------------------------|-------------|---------------------|
| <b>Run 7</b>     |                                 |             |                     |
| Sample injected  | Collected concentrated fraction |             |                     |
| Wavelengths used | UV1: 254 nm                     | UV2: 240 nm | UV3: 288 nm         |
| Solvent Used     | Solvent A: 1% Acetic Acid       |             | Solvent B: Methanol |
| Type of column   | Reverse Silica C18 12g          |             |                     |

|                    |                                                                                    |         |          |                          |
|--------------------|------------------------------------------------------------------------------------|---------|----------|--------------------------|
| Gradient Table     |                                                                                    | Minutes | Solvents | %2 <sup>nd</sup> solvent |
|                    | 1                                                                                  | 0.0     | AB       | 0                        |
|                    | 2                                                                                  | 0.5     | AB       | 60                       |
|                    | 3                                                                                  | 3.1     | AB       | 65                       |
|                    | 4                                                                                  | 2.0     | AB       | 66                       |
|                    | 5                                                                                  | 2.4     | AB       | 70                       |
| Flow Rate          | 10 ml/min                                                                          |         |          |                          |
| Flash chromatogram | 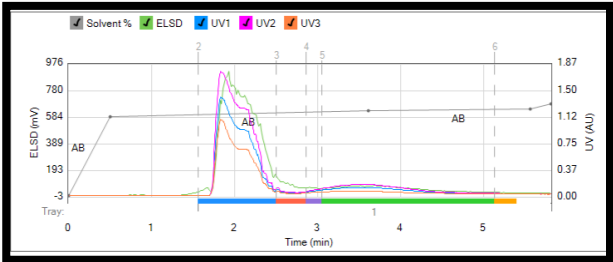 |         |          |                          |
| Interpretation     | Good separation.                                                                   |         |          |                          |

| No. of repeats | Flash chromatogram                                                                   |
|----------------|--------------------------------------------------------------------------------------|
| 1              | 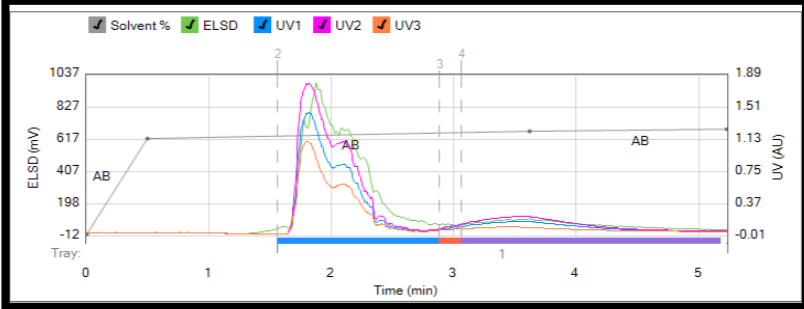 |
| 2              |  |

3

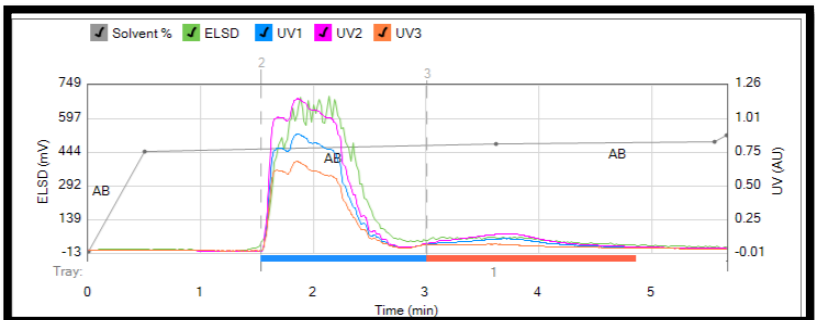

Supplementary 2

**Figure S1.** Heteronuclear Multiple bond correlation (HMBC) Spectrum.

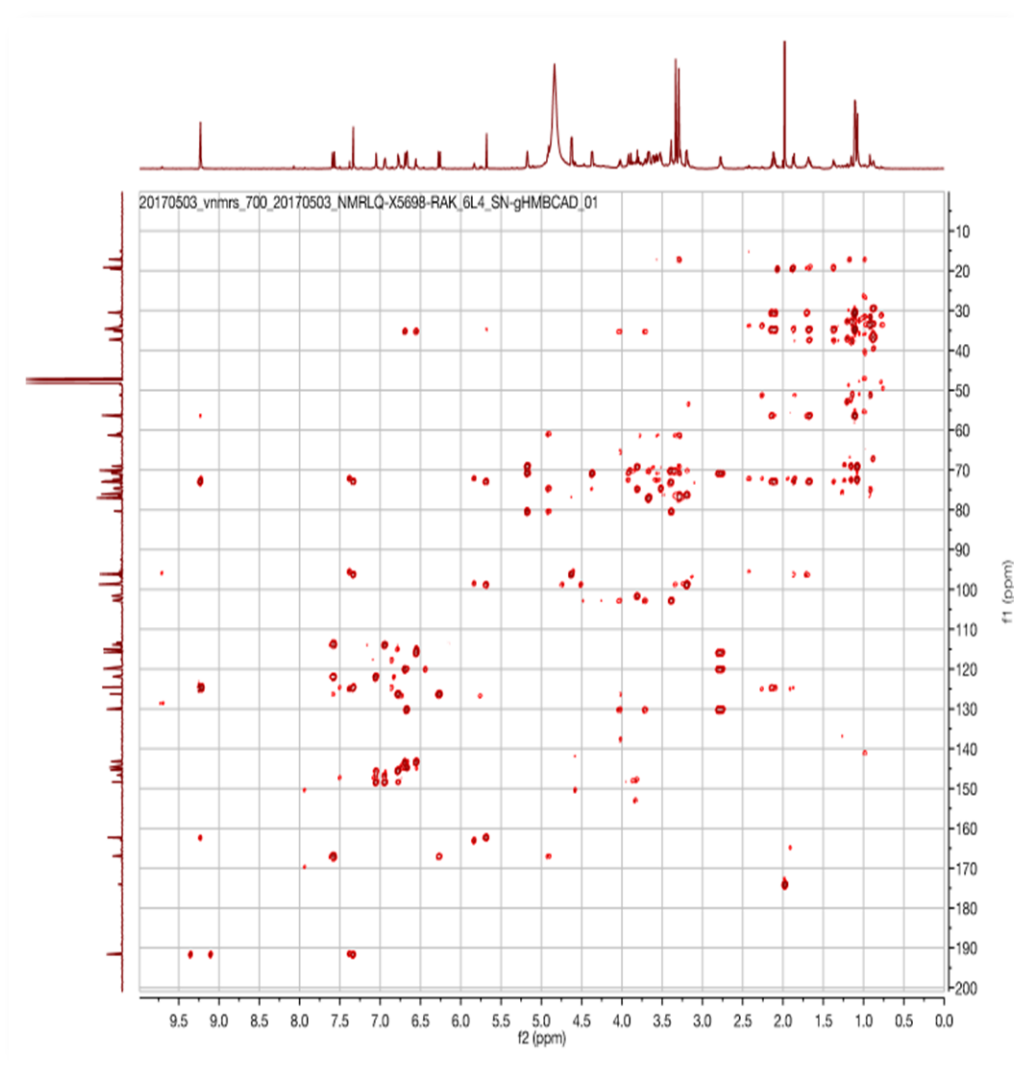

Figure S2. Heteronuclear single quantum Correlation (HSQC) Spectrum for Fraction A-3

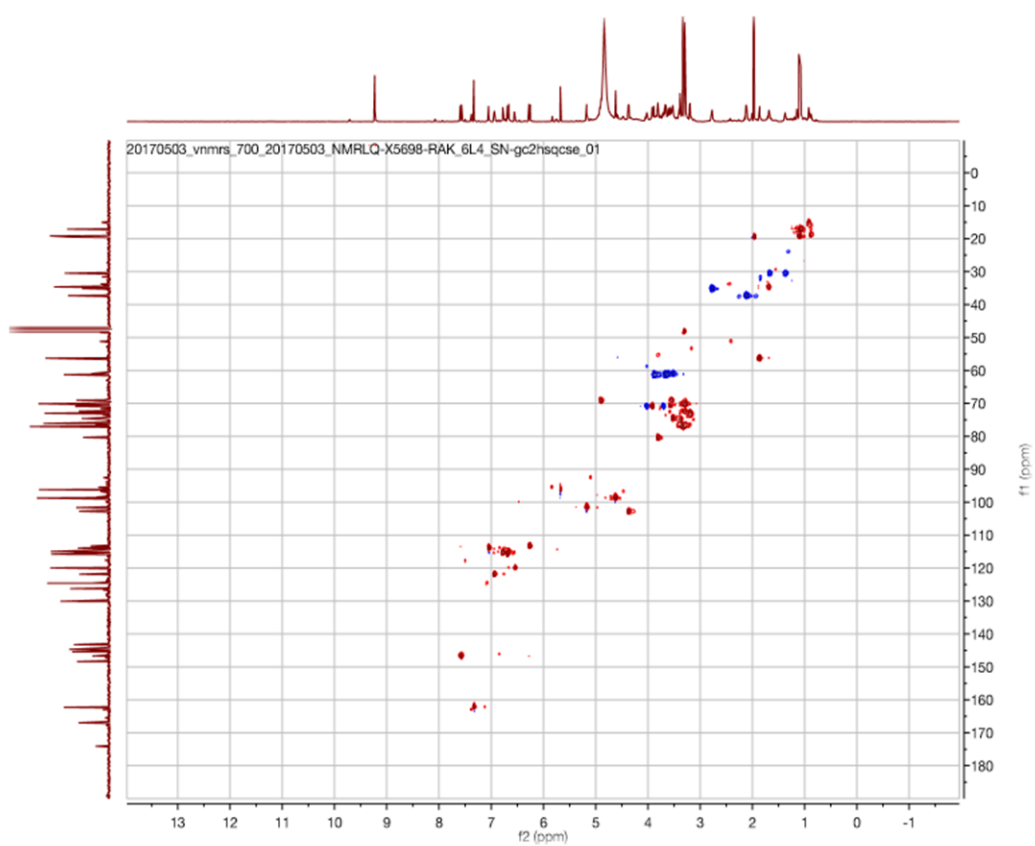



Figure S3. Homonuclear correlation spectroscopy (COSY) Spectrum for Fraction A-3

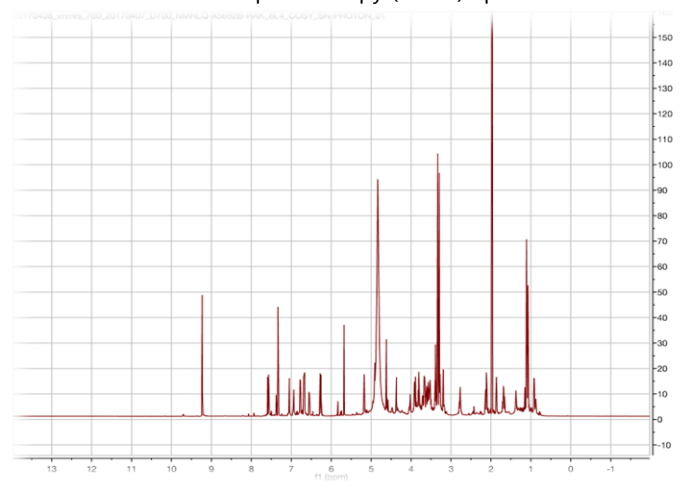

Figure S4. Total correlated spectroscopy (TOCSY) Spectrum.

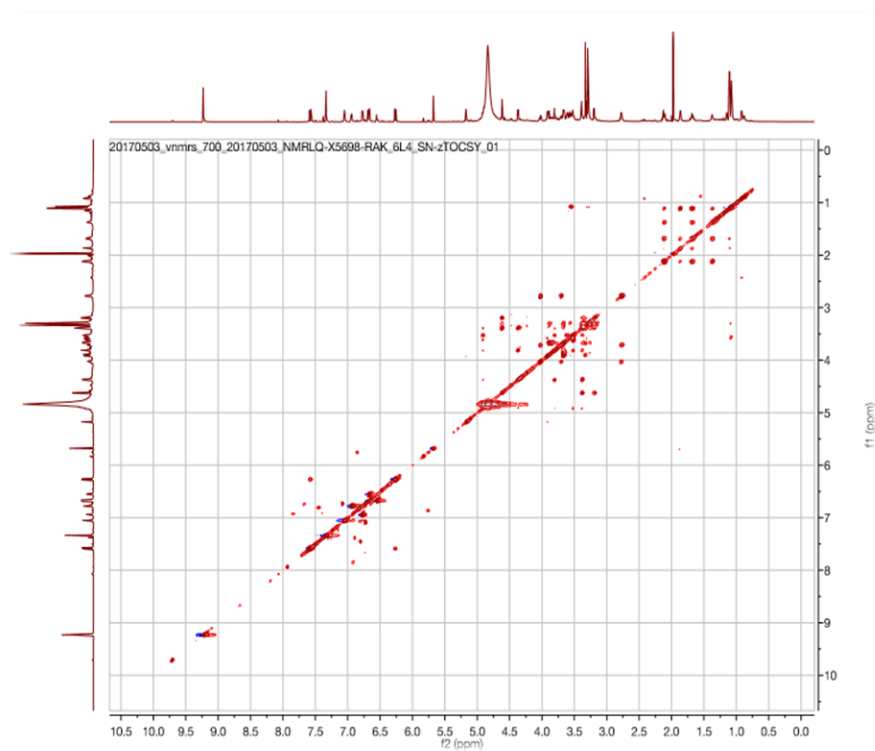

Supplement: s1 [file s1]
